# Supplementary material for: A negative feedback loop at the nuclear periphery regulates GAL gene expression
Source: PubMed Central journal article supplement — Mol Biol Cell. 2012 Apr 1;23(7):1367–75. doi: 10.1091/mbc.E11-06-0547 (PMC3315802; doi:10.1091/mbc.e11-06-0547), 2012-04-01
Supplement: supp_E11-06-0547_CombinedSupMats.pdf [file supp_E11-06-0547_CombinedSupMats.pdf]

**Table S1.** Yeast strains used in this study.

| Strain # | Genotype                                                                                                        | Source                               |
|----------|-----------------------------------------------------------------------------------------------------------------|--------------------------------------|
| KWY681   | <i>MATa nup1Δ::HIS3</i>                                                                                         | (Zeitler and Weis, 2004)             |
| KWY1695  | <i>MATa ada2Δ::KANMX</i>                                                                                        | this study                           |
| KWY1622  | <i>MATa ybr022w::LacO::LEU2 his3::LacI-GFP::HIS3 trp1::dsRED-HDEL::TRP1</i>                                     | this study                           |
| KWY1758  | <i>MATa ybr022w::LacO::LEU2 his3::LacI-GFP::HIS3 trp1::dsRED-HDEL::TRP1 ada2Δ::KANMX</i>                        | this study                           |
| KWY1823  | <i>MATa ybr022w::LacO::LEU2 his3::LacI-GFP::HIS3 trp1::dsRED-HDEL::TRP1 nup1Δ::NATMX</i>                        | this study                           |
| KWY2348  | <i>MATa gall::GAL1-GFP::KANMX</i>                                                                               | this study                           |
| KWY2645  | <i>MATa ada2Δ::NATMX gall::GAL1-GFP::KANMX</i>                                                                  | this study                           |
| KWY2003  | <i>MATa nup2::Nup2-LacI::KANMX</i>                                                                              | this study                           |
| KWY2082  | <i>MATa ybr022w::LacO::LEU2 his3::LacI-GFP::HIS3 trp1::dsRED-HDEL::TRP1 nup2::Nup2-LacI::KANMX</i>              | this study                           |
| KWY2079  | <i>MATa ybr022w::LacO::LEU2 trp1::dsRED-HDEL::TRP1 nup2::Nup2-LacI::KANMX</i>                                   | this study                           |
| KWY2117  | <i>MATa ybr022w::LacO::LEU2 trp1::dsRED-HDEL::TRP1 nup2::Nup2-LacI::KANMX nup1Δ::HIS3</i>                       | this study                           |
| KWY3272  | <i>MATa ybr022w::LacO::LEU2 his3::LacI-GFP::HIS3 trp1::dsRED-HDEL::TRP1 nup2::Nup2-LacI::KANMX nup1Δ::NATMX</i> | this study                           |
| KWY1302  | <i>MATa rpb1-1</i>                                                                                              | this study; (Morrissey et al., 1999) |
| KWY2551  | <i>MATa rpb1-1 nup1Δ::HIS3</i>                                                                                  | this study                           |
| KWY2552  | <i>MATa rpb1-1 ada2Δ::KANMX</i>                                                                                 | this study                           |
| KWY2619  | <i>MATa rpb1-1 ybr022w::LacO::LEU2 his3::LacI-GFP::HIS3 trp1::dsRED-HDEL::TRP1</i>                              | this study                           |

All KWY strains listed are derived from W303 [KWY165] (*ura3-1 leu2-3 his3-11,15 trp1-1 ade2-1*).

Morrissey, J. P., Deardorff, J. A., Hebron, C., and Sachs, A. B. (1999). Decapping of stabilized, polyadenylated mRNA in yeast *pab1* mutants. *Yeast* 15, 687-702.

Zeitler, B., and Weis, K. (2004). The FG-repeat asymmetry of the nuclear pore complex is dispensable for bulk nucleocytoplasmic transport in vivo. *J Cell Biol* 167, 583-590.

**Table S2.** Primers and probes used for qRT-PCR.

| <b>Primer #</b> | <b>Primer Name</b> | <b>Sequence</b>                          |
|-----------------|--------------------|------------------------------------------|
| UC2955          | Act1F              | TCCATTGCTTTGTCAAATGG                     |
| UC2956          | Act1R              | CCTGGAACCAAGTGAACAGT                     |
|                 | FAM-Act1-BHQ       | AGCCAGCTCCGGTCAAACGG                     |
| UC2997          | Gal1F              | TGGATTCCGGTGATGGTGTT                     |
| UC2998          | Gal1R              | TCAAAATGGCGTGAGGTAGAGA                   |
|                 | FAM-Gal1-BHQ       | CTCACGTCGTTCCAATTTACGCTGGTTT             |
| UC3304          | Fur4F              | GCATATCTATGTGGGGTGGCT                    |
| UC3305          | Fur4R              | ATCGACATTGGCCCATCTTT                     |
| UC3306          | Kap104F            | TCCAACCTGGTCTTCAAATGCT                   |
| UC3307          | Kap104R            | GGTCGTTTTTCGTCGTTTTGT                    |
| UC3219          | Gal1probeF         | CCGTTTAAATTTCCGCAATTA AAAAAC             |
| UC3220          | Gal1probeR         | CTAGCATCTTTGTAAACCGTTCGAT                |
| UC3187          | Scr1probe          | CCTCGCAGAGAGACGGATTCCCTCACGCCTCCTGCCAACG |
| UC3796          | Gal7F              | TTCTTGGCAAGCATTGACTG                     |
| UC3797          | Gal7R              | CCCATGGCTGTACCTTTGTT                     |
| UC3798          | Gal10F             | AAGTTACGGGCAGAAGAGCA                     |
| UC3799          | Gal10R             | CCTTGCAGGAGTCTTCAACC                     |

Supplemental Figure 1

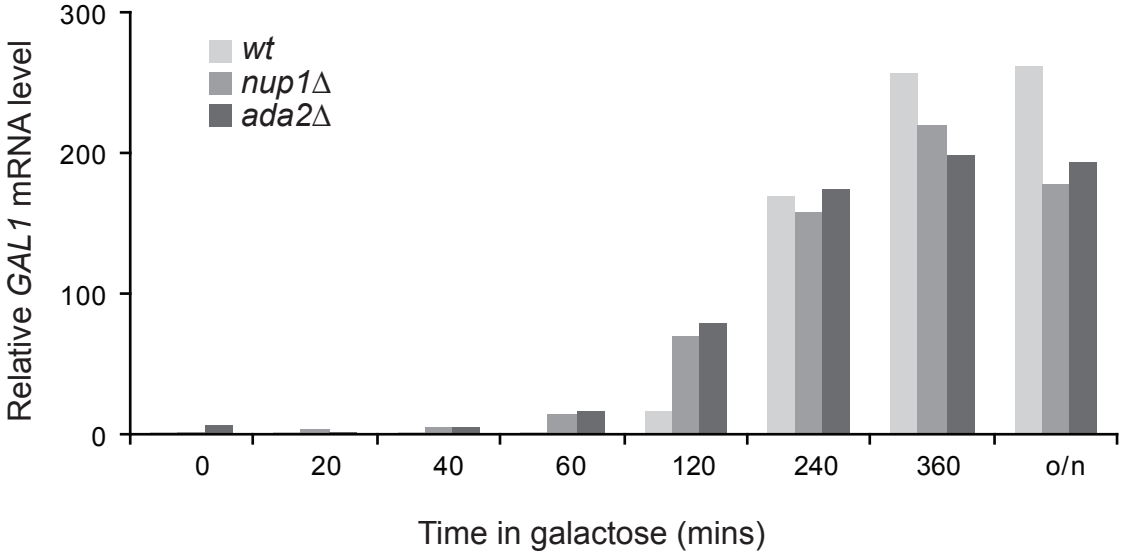

Supplemental Figure 2

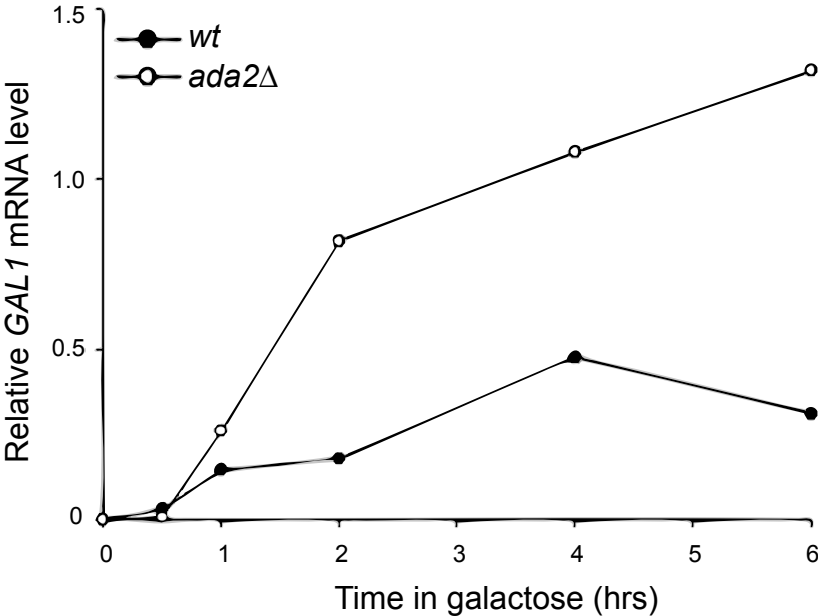

Supplemental Figure 3

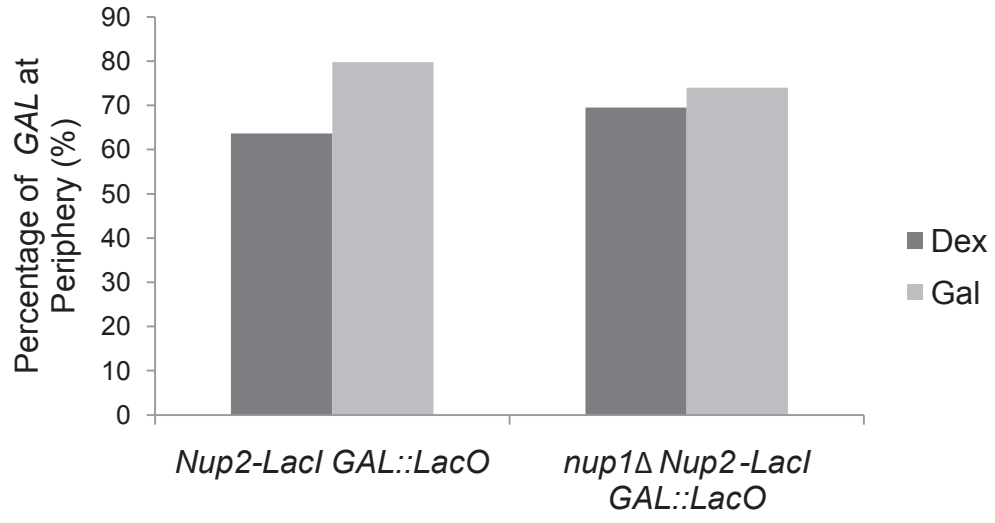

Supplemental Figure 4

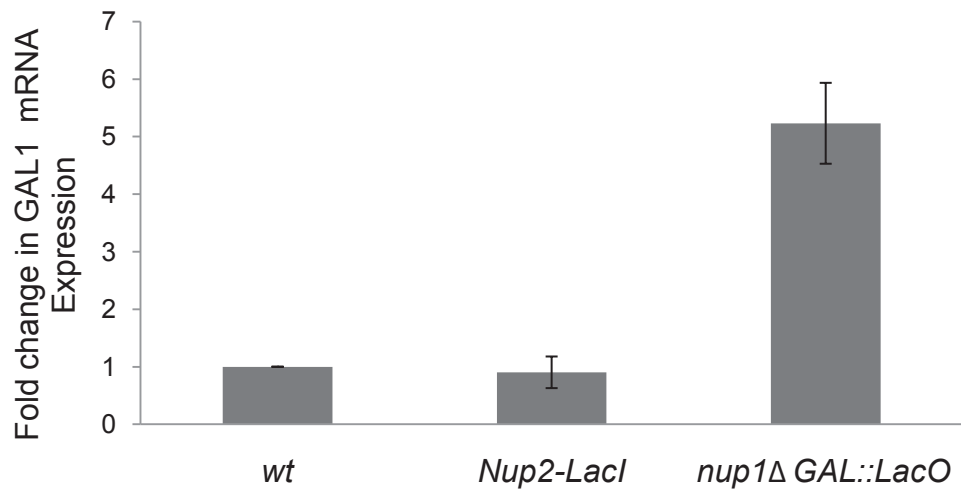

## Supplemental figure legends:

### **Figure S1. Long-term *GAL1* expression in wt and mutant cells.**

Wildtype, *nup1Δ* and *ada2Δ* cells were grown as described in **Figure 2A** and *GAL1* mRNA levels were measured at the indicated times in galactose by qRT-PCR and normalized to *ACT1*. (o/n, overnight.)

### **Figure S2. *GAL1* mRNA expression levels following growth in raffinose.**

Wildtype and *ada2Δ* cells were grown in SRaf medium to mid-log phase and then shifted to SGal medium. *GAL1* mRNA levels were measured by Northern blot, normalized to *SCR1* and plotted as a function of time in galactose.

### **Figure S3. *GAL* nuclear position in the presence of the Nup2-LacI gene tether.**

A Nup2-LacI fusion protein which binds the LacO repeats integrated near the *GAL* locus was expressed in both wildtype and *nup1Δ* mutant strains. Cells were grown and *GAL* locus peripheral localization was analyzed as described for **Figure 1A**. Approximately 50-100 cells were scored for each condition.

**Figure S4. *GAL1* mRNA levels with the Nup2-LacI gene tether.** *GAL1* mRNA levels were measured by qRT-PCR as described in **Figure 3**, after 1 hour induction with galactose.
